# Supplementary material
Source: Springer Nature journal article supplement (https://www.springermedizin.de/resource/supplementary/12967_2012_1341_MOESM5_ESM.pdf/9573270)
Supplement: MOESM5 [file 9573270]

Table 4a. Association of changes in biomarkers at 6 months with outcome  
(Relapse vs. NED)

| Biomarker              | n  | Slope   | p-value | $\frac{1}{2}$ IQR | OR (95% CI)         |
|------------------------|----|---------|---------|-------------------|---------------------|
| %-Ki67+EOMES+CD4+      | 19 | -3.5232 | 0.0285  | 0.5               | 0.17 ( 0.04, 0.83)  |
| %-CCR7+CD8+            | 37 | -0.0947 | 0.0379  | 7.4               | 0.50 ( 0.26 0.96)   |
| %-EOMES+CD8+           | 36 | 0.1758  | 0.0072  | 5.5               | 2.63 ( 1.30, 5.32)  |
| %-EOMES+GranzymeB+CD8+ | 19 | 0.2774  | 0.0293  | 5.8               | 5.00 ( 1.18, 21.23) |

Table 4b. Association of changes in biomarkers at 6 months with irAE (Yes vs. No)

| Biomarker   | n  | Slope   | p-value | $\frac{1}{2}$ IQR | OR (95% CI)        |
|-------------|----|---------|---------|-------------------|--------------------|
| %-Ki67+CD8+ | 36 | -0.3167 | 0.0217  | 2.4               | 0.47 ( 0.24, 0.89) |
